# Supplementary material for: A mesoporous tungsten carbide nanostructure as a promising cathode catalyst decreases overpotential in Li–O2 batteries
Source: Royal Society of Chemistry journal article supplement (doi:10.1039/c8ra05905e), 2018-01-01
Supplement: c8ra05905e1.pdf [file c8ra05905e1.pdf]

## Electronic supplementary information

# Mesoporous Tungsten Carbide Nanostructure as a Promising Cathode Catalyst Decreases Overpotential in Li-O<sub>2</sub> Battery

**Tab. S1** Overpotential comparisons of different electrocatalysts in cathode at first cycle.<sup>a</sup>

| Cathode                                                            | Electrocatalyst                                           | Current density                                       | Overpotential at first cycle          | Ref       |
|--------------------------------------------------------------------|-----------------------------------------------------------|-------------------------------------------------------|---------------------------------------|-----------|
| Cr <sub>2</sub> O <sub>3</sub> -MNT/Super P/PVDF                   | Cr <sub>2</sub> O <sub>3</sub> -MNT                       | 100 mA g <sup>-1</sup>                                | 1.09 V                                | 1         |
| Co <sub>4</sub> N/CNF                                              | Co <sub>4</sub> N                                         | 200 mA g <sup>-1</sup>                                | ~1.23 V (at 700 mAh g <sup>-1</sup> ) | 2         |
| C-Co <sub>3</sub> O <sub>4</sub> IO/KB/PVDF                        | C-Co <sub>3</sub> O <sub>4</sub> IO                       | 100 mA g <sup>-1</sup>                                | 1.21 V                                | 3         |
| Co <sub>3</sub> O <sub>4</sub> IO/KB/PVDF                          | Co <sub>3</sub> O <sub>4</sub> IO                         | 100 mA g <sup>-1</sup>                                | 1.13 V                                | 3         |
| MnCo-MOF-74/KB/PVDF                                                | MnCo-MOF-74                                               | 200 mA g <sup>-1</sup>                                | 1.26 V                                | 4         |
| nitrogen-doped LaNiO <sub>3</sub> /Vulcan XC-72/PVDF               | nitrogen-doped LaNiO <sub>3</sub>                         | 250 mA g <sub>cat</sub> <sup>-1</sup>                 | 1.24 V                                | 5         |
| LaCo <sub>0.8</sub> Fe <sub>0.2</sub> O <sub>3</sub> @rGO /KB/PVDF | LaCo <sub>0.8</sub> Fe <sub>0.2</sub> O <sub>3</sub> @rGO | 200 mA g <sup>-1</sup>                                | 0.98 V                                | 6         |
| MoC1-x/HSC/PVDF                                                    | MoC1-x/HSC                                                | 100 mA g <sup>-1</sup>                                | 0.58 V                                | 7         |
| Ru/r-hGO mesh                                                      | Ru                                                        | 0.1 A cm <sup>-2</sup>                                | ~0.9 V                                | 8         |
| Mo <sub>2</sub> C-NR@11NC                                          | Mo <sub>2</sub> C-NR@11NC                                 | 100 mA g <sup>-1</sup>                                | 0.28 V                                | 9         |
| Mo <sub>2</sub> C-NR@5NC                                           | Mo <sub>2</sub> C-NR@5NC                                  | 100 mA g <sup>-1</sup>                                | 0.45 V                                | 9         |
| Mo <sub>2</sub> C-NR@16NC                                          | Mo <sub>2</sub> C-NR@16NC                                 | 100 mA g <sup>-1</sup>                                | 0.52 V                                | 9         |
| WC-1/Super P/PTFE                                                  | WC-1                                                      | 100 mA g <sup>-1</sup><br>(0.06 mA cm <sup>-2</sup> ) | 0.93 V                                | This work |
| WC-1/Super P/PTFE                                                  | WC-1                                                      | 100 mA g <sup>-1</sup><br>(0.06 mA cm <sup>-2</sup> ) | 0.34 V (with LiI)                     | This work |

<sup>a</sup> Overpotential is denoted as the potential difference at half-capacity.

The overpotentials of Li-O<sub>2</sub> cells with different electrocatalysts have been compared. The results are listed in **Tab. S1**. According to the data, the catalyst M-WC-1 used in our research displays good property in reducing the overpotentials when comparing with the state-of-the-art electrocatalysts used in Li-O<sub>2</sub> cells in recent reports.

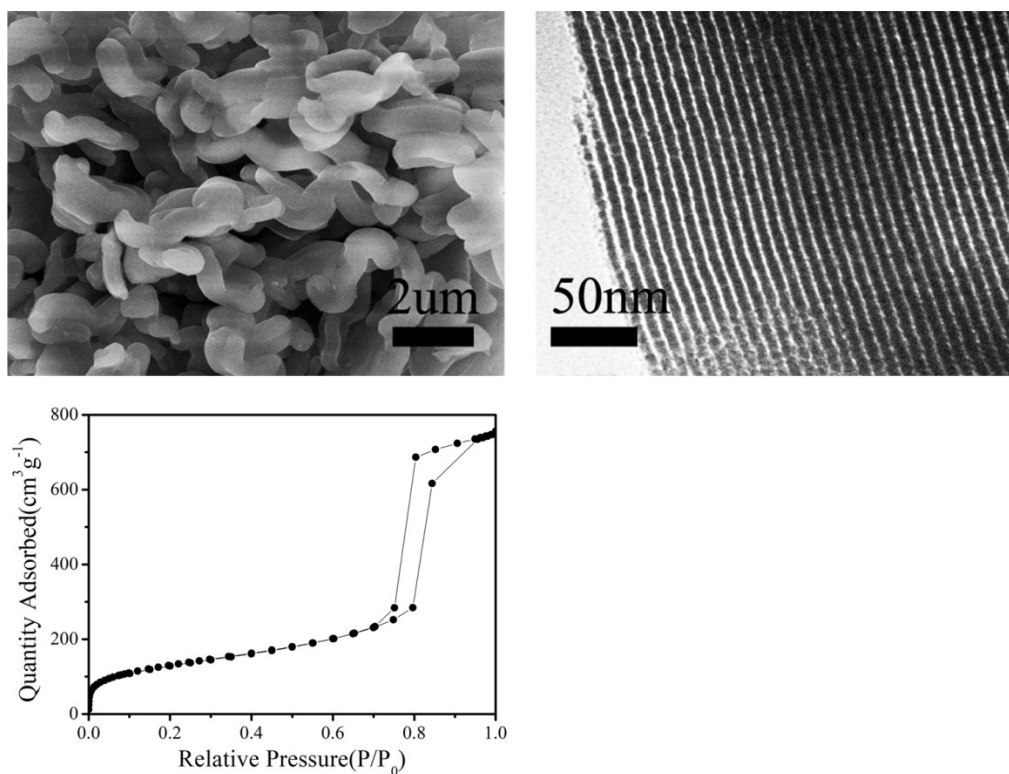

**Fig. S1** Structural characterization of typical SBA-15 silica template and nitrogen adsorption-desorption isotherms of SBA-15.

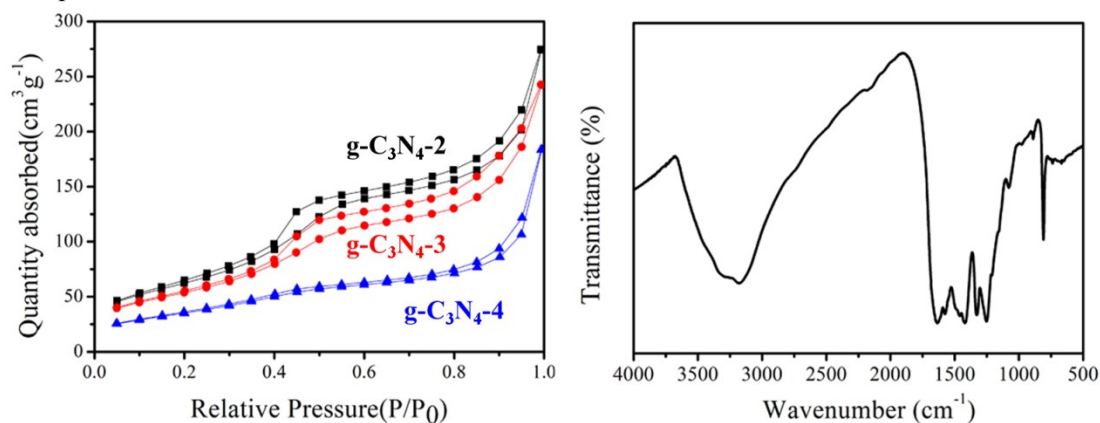

**Fig. S2** Nitrogen adsorption-desorption isotherms of  $g\text{-C}_3\text{N}_4$  samples and FT-IR spectra of  $g\text{-C}_3\text{N}_4$ .

In **Fig. S2**,  $g\text{-C}_3\text{N}_4\text{-2}$  was synthesized by vacuuming for 5 hours and calcining at 550 °C for 5 hours.  $g\text{-C}_3\text{N}_4\text{-3}$  was synthesized by vacuuming for 4 hours and calcining at 580 °C for 4 hours.  $g\text{-C}_3\text{N}_4\text{-4}$  was synthesized by vacuuming for 4 hours and calcining at 550 °C for 5 hours. The specific surface areas of  $g\text{-C}_3\text{N}_4\text{-2}$ ,  $g\text{-C}_3\text{N}_4\text{-3}$ ,  $g\text{-C}_3\text{N}_4\text{-4}$  are 259.0, 223.0, 160.0  $\text{m}^2 \text{g}^{-1}$ , respectively.

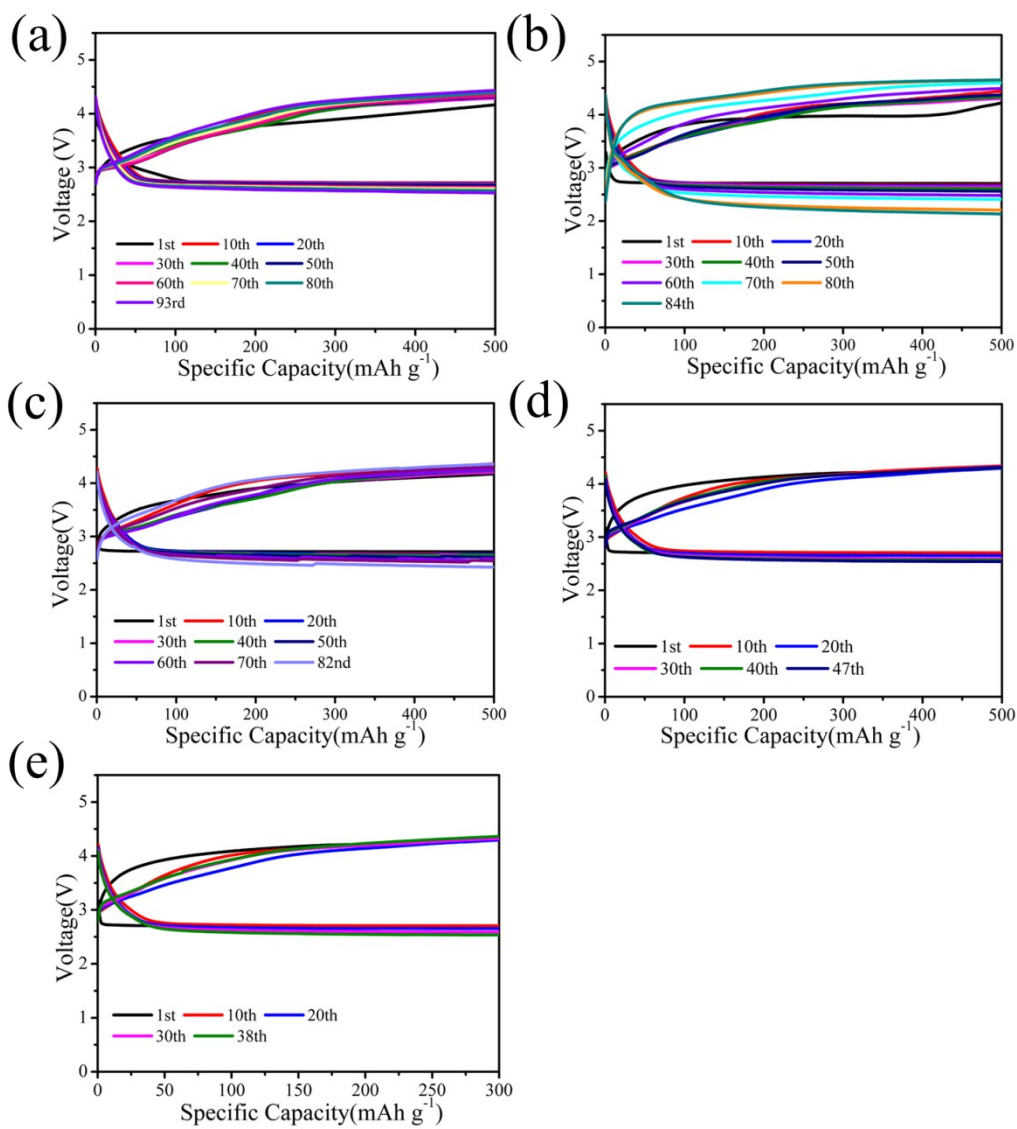

**Fig. S3** Cycles of Li-O<sub>2</sub> batteries with WC-2 (a), WC-3 (b), WC-4 (c), g-C<sub>3</sub>N<sub>4</sub> (d) and hard carbon (e) under limited capacity of 500 mAh g<sup>-1</sup> at 100 mA g<sup>-1</sup>.

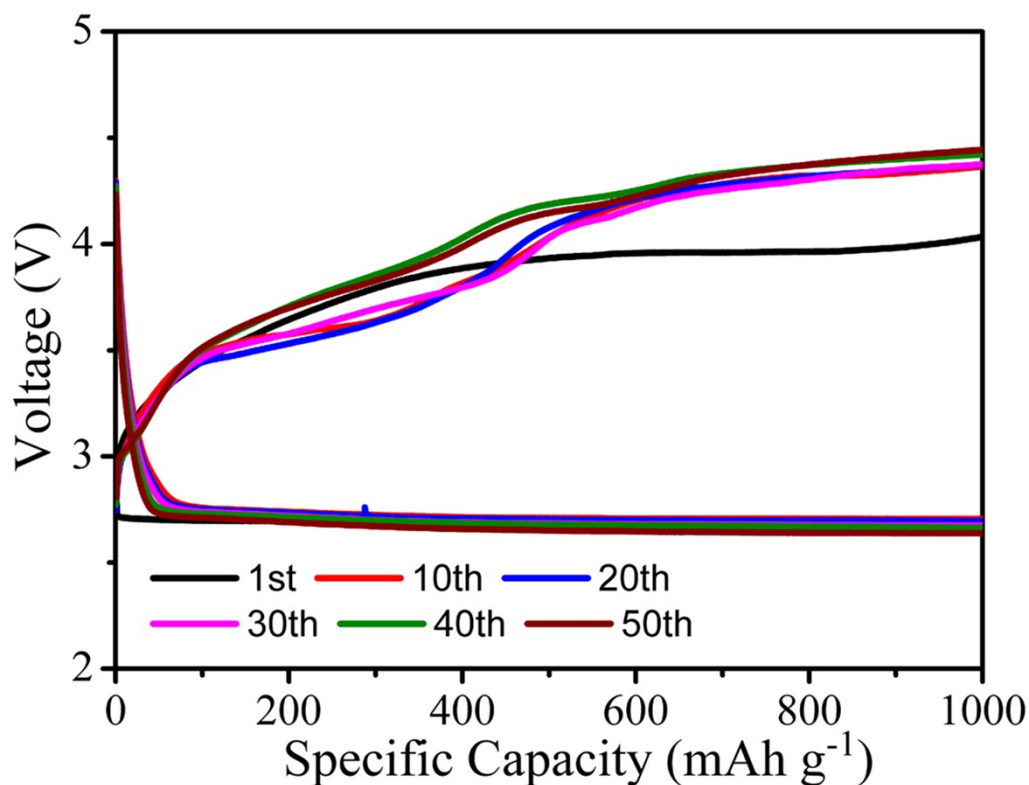

**Fig. S4** Cycles of Li-O<sub>2</sub> batteries with WC-1 under limited capacity of 1000 mAh g<sup>-1</sup> at 100 mA g<sup>-1</sup>.

#### References

1. X.-Z. Zhang, D. Han, Y.-B. He, D.-Y. Zhai, D. Liu, H. Du, B. Li and F. Kang. *J. Mater. Chem. A*, 2016, **4**, 7727-7735.
2. K. R. Yoon, K. Shin, J. Park, S.-H. Cho, C. Kim, J.-W. Jung, J. Y. Cheong, H. R. Byon, H. M. Lee and I.-D. Kim. *ACS Nano*, 2018, **12**, 128-139.
3. S. A. Cho, Y. J. Jang, H.-D. Lim, J.-E. Lee, Y. H. Jang, T.-T. H. Nguyen, F. M. Mota, D. P. Fenning, K. Kang, Y. Shao-Horn and D. H. Kim. *Adv. Energy Mater.*, 2017, **7**, 1700391.
4. S. H. Kim, Y. J. Lee, D. H. Kim and Y. J. Lee. *ACS Appl. Mater. Interfaces*, 2018, **10**, 660-667.
5. J. Zhang, C. Zhang, W. Li, Q. Guo, H. Gao, Y. You, Y. Li, Z. Cui, K.-C. Jiang, H. Long, D. Zhang and S. Xin. *ACS Appl. Mater. Interfaces*, 2018, **10**, 5543-5550.
6. J. G. Kim, Y. Kim, Y. Noh, S. Lee, Y. Kim and W. B. Kim. *ACS Appl. Mater. Interfaces*, 2018, **10**, 5429-5439.
7. Y. Xing, Y. Yang, R. Chen, M. Luo, N. Chen, Y. Ye, J. Qian, L. Li, F. Wu and S. Guo. *Small*, 2018, 1704366.
8. S. D. Lacey, D. J. Kirsch, Y. Li, J. T. Morgenstern, B. C. Zarket, Y. Yao, J. Dai, L. Q. Garcia, B. Liu, T. Gao, S. Xu, S. R. Raghavan, J. W. Connell, Y. Lin and L. Hu. *Adv. Mater.*, 2018, **30**, 1705651.
9. G. Sun, Q. Zhao, T. Wu, W. Lu, M. Bao, L. Sun, H. Xie and J. Liu. *ACS Appl. Mater. Interfaces*, 2018, **10**, 6327-6335.
